# Supplementary material for: High Throughput Profiling of Molecular Shapes in Crystals
Source: PubMed Central journal article supplement (PMC4764928; doi:10.1038/srep22204), 2016-02-24
Supplement: srep22204-s1.pdf [file srep22204-s1.pdf]

# High throughput profiling of molecular shapes in crystals: Supplementary Information

Peter R. Spackman<sup>1,\*</sup>, Sajesh P. Thomas<sup>1</sup>, and Dylan Jaytilaka<sup>1</sup>

<sup>1</sup>University of Western Australia, Dept. of Chemistry, Crawley, Western Australia, 6008, Australia

\*spackp01@student.uwa.edu.au

## Data and tables

All CIF files were retrieved from the Inorganic Crystal Structure Database (ICSD) in the case of metallic crystals, or Cambridge Structural Database (CSD) in the case of molecular crystals.

**Supplementary Table S1.** Metallic crystal structures used

| Element | ICSD Code | Crystal System |
|---------|-----------|----------------|
| Ag      | 64706     | CCP            |
| Ba      | 56132     | CCP            |
| Be      | 1425      | HCP            |
| Ca      | 53768     | CCP            |
| Cd      | 619639    | HCP            |
| Co      | 52935     | HCP            |
| Cr      | 41505     | CCP            |
| Cs      | 44754     | CCP            |
| Fe      | 41506     | CCP            |
| K       | 44756     | CCP            |
| Li      | 44759     | CCP            |
| Mg      | 52260     | HCP            |
| Mn      | 41509     | CCP            |
| Mo      | 41513     | CCP            |
| Na      | 44757     | CCP            |
| Nb      | 41512     | CCP            |
| Ni      | 41508     | CCP            |
| Pd      | 41517     | CCP            |
| Rb      | 44755     | CCP            |
| Rh      | 41516     | CCP            |
| Ru      | 40354     | HCP            |
| Sc      | 164088    | HCP            |
| Sc      | 41502     | CCP            |
| Sr      | 44721     | CCP            |
| Tc      | 41514     | CCP            |
| Ti      | 41503     | CCP            |
| Ti      | 43416     | HCP            |
| Y       | 660002    | HCP            |
| Zr      | 53785     | HCP            |

**Supplementary Table S2.** Phenylbenzamide CSD codes

|          |          |          |          |          |          |
|----------|----------|----------|----------|----------|----------|
| ACAKEU   | FITLUR   | IWAQON   | MAZWIU   | QITTOD   | WAFNEX   |
| ACAKOE   | FOWXIZ   | IWAQUT   | MIGVAA   | QITTUJ   | WAWMAJ   |
| ACALAR   | GAQGIQ   | IWARAA   | MISCEX   | QITVAR   | WAWMEN   |
| ACALEV   | GEHKIN   | IWAREE   | MODSOO   | QIXMUG   | WIGYOC   |
| ACALIZ   | GISYOX   | IWARII   | MUBBUH   | QUKVUN   | WIPFUX   |
| ACALUL   | GIXDOI   | IWAROO   | MUBHEX   | QUYGAT   | WOJLIS   |
| ASAYID   | GOLWAG   | IWARUU   | NAQSUT   | RIYQIA   | WOMWUR   |
| AWEWAB   | HEBFUR   | IWASAB   | NICHOY   | ROFMEF   | XIYXOT   |
| AXAHUD   | HEXXUE   | IWASEF   | NIDGAK   | ROGHAX01 | YAGBIT   |
| AYOTOY   | HIGCAB   | IWASIJ   | NORHUY   | SABFIM   | YAYCEI   |
| AZALOD   | HIRGOF   | IWASOP   | NUQGAI   | SAFRUO   | YAYJUF   |
| AZUVOH   | HIRROR01 | IWASUV   | NUQLIV   | SAFVIG   | YEGJID   |
| BATYAY   | HISDIX   | IWATAC   | NUQWEC   | SAGLOD   | YEGJID01 |
| BEBMEB   | HIVCOF   | IWATEG   | OBOXEK   | SAGYUW   | YEGJOU   |
| BUTDID   | HIZVUJ   | JABWIT   | OBUCEV   | SAMBOY   | YEGJUP   |
| BUTDOJ   | HOLKOJ   | JAVWIN   | OBUWOZ   | SAMBUE   | YIQWAX   |
| BZANIL02 | HOZCEF   | JAVWIN01 | OCAGOQ   | SAMCAL   | YIQYED   |
| CEGVOB   | HUDXEK   | JIZRUH   | OCARER   | SAMCAL01 | YIRHOX   |
| COQSAD   | HUGLAX   | JODTEB   | OCEMIU   | SAMCEP   | YIRHOX01 |
| CUZZUS   | HULHAX   | KADZEU   | OJUJEJ   | SAQKEA   | YOCVES   |
| DIBDAU   | ICLSAL   | KEMREZ   | PADTIX   | SAQKEA01 | YODDUR   |
| DIBDEY   | ICULEX   | KIZRIV   | PADTUJ   | SECDEL   | YODFAZ01 |
| DIBDIC   | ICULOH   | KODTUT   | PAVMAC   | TAQBIX   | YODMOU   |
| DIBDOI   | IKAYOJ   | KODVOP   | PAXNEJ   | TEGLEW   | YOTROP   |
| DIBDUO   | IMARUK   | KOFDOZ   | PCHSAN   | TIGMEC   | YOVNED   |
| DIBFAW   | INODIY   | KUVJER   | PCHSAN01 | UCOVAJ   | YUQLIG   |
| DIBFEA   | INODUK01 | LAPHAN   | PIFLAS   | VABVEB   | YUQMAZ   |
| DIBFOK   | IQOHIF   | LAPZAF   | PILMIH   | VACCOT   | YUXMEK   |
| DIMTOK   | IWAMOJ   | LAQDOY   | POPVUM   | VECCAH   | YUYTOB   |
| DIWRAD   | IWAMUP   | LASHIY   | POPWUN   | VECCEL   | ZAPWOE   |
| DIXDOD   | IWANIE   | LASHOE   | PUFFEC   | VIKHIH   | ZAPXUL   |
| DUSDAX   | IWANOK   | LASJAS   | PUFLEI   | VIPGOR   | ZOQWUZ   |
| EFAZES   | IWANUQ   | LEFKEO   | PUGKUY   | VOFBID   |          |
| ENUKAA   | IWAPAY   | LEPNEA   | QALDEO   | VOLJIR01 |          |
| EVAHUF   | IWAPEC   | LEPNIE   | QEDLES   | VOLJUD   |          |
| EVIXOX   | IWAPIG   | LEPNUQ   | QITSOC   | VOQJAN   |          |
| FABBAN   | IWAPOM   | LEPPAY   | QITSUI   | WACQAU   |          |
| FACYAK   | IWAQAZ   | LESLIG   | QITTAP   | WADBEC   |          |
| FENPIX01 | IWAQED   | LIVZOG   | QITTET   | WADCEL   |          |
| FICLAG   | IWAQIH   | MAJROG   | QITTIX   | WAFKAR   |          |

**Supplementary Table S3.** Phenylbenzamide pyridine analogue CSD codes

AMUCUH  
AMUDIW  
AMUFAQ  
COFVOK  
DIFMOW  
FOBMEP  
HIFWUO  
NOPNIR  
PEDDIM01  
PELKUN  
PELKUN01  
PELLOI  
PELLUO  
PYDCXA10  
PYDCXA11  
QEKNUQ  
TICDOZ  
TICDOZ01  
UXEXOL01  
UXEYAY  
ZAQNIQ

**Supplementary Table S4.** Benzene CSD codes

ABUMIT  
AMPHOL01  
AMPHOM03  
BENZEN07  
BZONTR  
DCLBEN03  
FACFAQ  
FACFOE  
PBRPOL  
PCYPOL  
QQQBNG01  
REKYAI  
WANMUU01

**Supplementary Table S5.** Benzene pyridine analogue CSD codes

AMIPYR  
AMPYRD  
AMPYRE  
HOFGEO  
ISNICA  
MAGXAV  
ZZZHKQ02

**Supplementary Table S6.** Naphthalene CSD codes

BOTSOT  
CUKFOE  
HNAPAC  
HNAPAC01  
JEVMON  
JUBBIR  
NAPDCX  
NAPHOL01  
NAPHTA15  
NAPMCB  
NAPXAC01  
NPHHQU10  
OGEHOY  
PEYGEF  
PEYGEF01  
QEPGAU  
QEXRAN  
RACPAM  
SAHSID  
SAYRIT  
SECKES  
SOYRAA  
VABGIQ  
VUPYAH  
XEJNUV03  
XENLEJ  
YODLIN

**Supplementary Table S7.** Naphthalene pyridine analogue CSD codes

CLQUIN  
HXQUIN14  
LOCJIX  
NONMEI  
QEWHOR  
SAZNIQ  
SECQEY  
UPAJIF  
WIWCAH
